# Supplementary material for: Type-I Prenyl Protease Function Is Required in the Male Germline of Drosophila melanogaster
Source: PubMed Central journal article supplement (PMC3362292; doi:10.1534/g3.112.002188), 2012-06-01
Supplement: supp_2.6.629_002188SI.pdf [file supp_2.6.629_002188SI.pdf]

```

At_Ste24p -----MAFPMETVVG---FMVVMYIFNYTDLRQUTALQPT-LPKTIVGVVSGQKPKKRAVSDSDSYFHFVHFVPT-ILMDSAIFPFIL
Sc_Ste24p -----MFDLKTLDHPNPKWKLISG---FSAQGFSSVYTVROYQKLSK-LDPVVEDEDDTTPHKSRNYSRAKAFSLGQDYN-LAQKLVFKYDLF
Hs_Zmpste24 -----MGWASLDALWEMPAEKRFVGVLLFSWTYVWTFLAQRORRYKCTHVPPEGGIMDSPTPKSRVYQDDSTSFWSGLYS-ETRTGLILFQGI
Ce_Ste24p -----MDASCLEKALLAT-----NWLFLWQVTFTRQYKAHNAVKRPNVKKELIGEDYKKAARDYKIDNHIFGFFHSWFN-QLLLTAQILGQYY
Dm_CG9000 -----MSSLDADTVLISLFLVVIEN-----ALGIVESLRQVYQTKLVPAKSKSHMGEDTTHKARVYGDQEKRFQKAVVMDVALLCMEVIGLI
Dm_CG9001 -----MSAFWDDPLALEYFIAPLVLDN-----LGVVEMLRDQVAKKQVQVAVSYFLPQBLDQKPKIKIRQWVIVNTLLSAVILGIMEVTFEY
Dm_CG9002 -----MAFYDTWPKVDPFVLLVCLLIWVDR-----LWEMTLTRKQLVCLNAWVPEKRGILPPPIVHRAVYSHHTELOHWKYLID-LIITLCELTGFPY
Dm_CG7573 MNSFALYQDPLRGEVLKISGNQIGMSVVPKLSFSDPILLRHILCLVIVVHNSFHILCCRQLKLCRRSVPKOMEKILSQABQAQSRKQDHAASSLIDFNIAID-TLYSCLDLMLCTL
consensus -----m-----lm-llf-liv-----yaweilyt-Rqiri-k-t-vp-el-vi-e-f-kar-y-lks-f-if-vv-ilm-velifg--

DMPFKNSG---AVLPRGLDPENLHTPTACVMTWSQITDPPSISHTFVLSSEHGFN--KQIIMWPFQDMKRTFLSVLLGPFVAAIIFVQKGGPFLAIFDQAPFLISLW
At_Ste24p BKIKHMAVSLNLAVLP-VFHMVNSTVAOSCPICGLGSLSTIVLDLPSVYGHVYLEEHEGFN--KPTVQLWQDMKSLTLAYAGGPVLYFLKFDKFPFLLWVIMVPLFVQIDA
Sc_Ste24p PVPVRLSG---RFGYAGFGPEYETOSVFLLLALTSALTGLPWSLVNTFVLEEHGFN--QOTLGFPMKDAKRFVVGCCILLPVSSLLLYIKIGQYFFVAVLFLVVSIVL
Hs_Zmpste24 PPLWYATA-----SYPLHVAVPLSINSHIETIDLPWLVSTFLEDAHGFN--KQTIGPFYVDKIKKMLVGFALTMPIVYVGEWIVVNGQYFFVAVLFLVVSIVL
Ce_Ste24p AVVWQDSV---QVVDKQWDSKNEHIVSCVFLISNVLSTFKGLPKIYKIFVLEETHGFN--KQIARFEAWDQKGFVVGQVLMIPITAAIFVIVQSGDNFPHLWLEFFGVISIVL
Dm_CG9000 AMVYGVAG---KCAISKWMSEHACVSYVFLVLLQVYFWMKSVAMVSSCCIKSLQGRF--RPPWMSRICHFVVDLVGAMITLTVVQALVYMFIGDQAPLGLNPOSLILTRIV
Dm_CG9001 PPLWYATA-----KTLQKITSQITWITHEVYFLYVICRPPVLLYKCHLQVLYMGS--PPWYLYCCIQAISILLQVLRDPLAAAVVGVKFKIYFFVWVWVWATTYDLE
Dm_CG7573 APVWLVGVG---MYHYADSTWNVMTVTFVYLVVVKRLSLPDKKLVLDPRYVNDPEKTPPLGLCALVYVVFVQVAVIPLTATFMAHMLSEWYFFLFWVGLGVLGSLVY
consensus pvlw-lsg-----l-f---ei-vslvfl-lvslws-ik-lpf-ly-tviveerhgf--kqti--fi-d-ik-lvvsqilllpvaaiiflv-gg-yffilywlfm-vlslll

MTIYVFIADLEKRFPLDDE-DREKTEKLSGSKFFLKRIFVVGSGSRSSHSNAYFYCF-FKNKRIVLFDTLQCC-----KNEDEI
At_Ste24p MTHVFIADLEKRFPLDDE-DREKTEKLSGSKFFLKRIFVVGSGSRSSHSNAYFYCF-FKNKRIVLFDTLQCC-----KNEDEI
Sc_Ste24p VTIYADFIADLEKRFPLDDE-KKKEEYVMAKSIDPPLKVVVYVSGSRSSHSNAYFYCF-FKNKRIVLFDTLQCC-----KNEDEI
Hs_Zmpste24 VTIYADFIADLEKRFPLDDE-KKKEEYVMAKSIDPPLKVVVYVSGSRSSHSNAYFYCF-FKNKRIVLFDTLQCC-----KNEDEI
Ce_Ste24p MTHVFIADLEKRFPLDDE-DREKTEKLSGSKFFLKRIFVVGSGSRSSHSNAYFYCF-FKNKRIVLFDTLQCC-----KNEDEI
Dm_CG9000 LTIYVFIADLEKRFPLDDE-ALRQSEEDLAASIKFPLRIFVVGSGSRSSHSNAYFYCF-FKNKRIVLFDTLQCC-----KNEDEI
Dm_CG9001 LTIYVFIADLEKRFPLDDE-NMRTQEVNTRQVGFPMNSQVRIIRVHDPNTEGSAIFYCF-CCKRIVLFDTLQCC-----KNEDEI
Dm_CG9002 VFFLHCCFPCIGSQVWVLEDAITMEKVKCDVVGPKMKRIFKIK-TRTMQSNAYFYCF-CCKRIVLFDTLQCC-----KNEDEI
Dm_CG7573 LAFVGLGVGCLGSGRKMNS-DMDNSLKAVALDDPFG-PLVWHTFHVQ-RFPAWVGC-CCLRHDHDKKRWKGFSS-----SDDFDGQMGALNDEQL
consensus mtiyvfiafif-kfcpdpd-dir-1e-la-sl-1fptkvfvvgdskrsshsnayfygf-f-kkrivlfdtl-nkkg-----e-e---d-grgm-edev

*****
VAVVAHELGHWRNHTHTYSPFAVQILAFLQGGYTLVRNSTDFRSFGEDTQ-----PVLIG-LIIFQHTVIFLQHWVSGLNLVSRAPFEGADAFVAKLGYAKDRPAPL
At_Ste24p TAVLAHELGHWRNHTHTYSPFAVQILAFLQGGYTLVRNSTDFRSFGEDTQ-----PVLIG-LIIFQHTVIFLQHWVSGLNLVSRAPFEGADAFVAKLGYAKDRPAPL
Sc_Ste24p TAVLAHELGHWRNHTHTYSPFAVQILAFLQGGYTLVRNSTDFRSFGEDTQ-----PVLIG-LIIFQHTVIFLQHWVSGLNLVSRAPFEGADAFVAKLGYAKDRPAPL
Hs_Zmpste24 LAVVAHELGHWRNHTHTYSPFAVQILAFLQGGYTLVRNSTDFRSFGEDTQ-----PVLIG-LIIFQHTVIFLQHWVSGLNLVSRAPFEGADAFVAKLGYAKDRPAPL
Ce_Ste24p VAVVAHELGHWRNHTHTYSPFAVQILAFLQGGYTLVRNSTDFRSFGEDTQ-----PVLIG-LIIFQHTVIFLQHWVSGLNLVSRAPFEGADAFVAKLGYAKDRPAPL
Dm_CG9000 LAVVAHELGHWRNHTHTYSPFAVQILAFLQGGYTLVRNSTDFRSFGEDTQ-----PVLIG-LIIFQHTVIFLQHWVSGLNLVSRAPFEGADAFVAKLGYAKDRPAPL
Dm_CG9001 VAVVAHELGHWRNHTHTYSPFAVQILAFLQGGYTLVRNSTDFRSFGEDTQ-----PVLIG-LIIFQHTVIFLQHWVSGLNLVSRAPFEGADAFVAKLGYAKDRPAPL
Dm_CG9002 AVVVAHELGHWRNHTHTYSPFAVQILAFLQGGYTLVRNSTDFRSFGEDTQ-----PVLIG-LIIFQHTVIFLQHWVSGLNLVSRAPFEGADAFVAKLGYAKDRPAPL
Dm_CG7573 AVVVAHELGHWRNHTHTYSPFAVQILAFLQGGYTLVRNSTDFRSFGEDTQ-----PVLIG-LIIFQHTVIFLQHWVSGLNLVSRAPFEGADAFVAKLGYAKDRPAPL
consensus vavlahelghwrnhthtyspfahvqilaflqggylvvrnstdf-rsfgedtq-----pvlig-lifqhtviflqhwvs-glnlvsrapfegadafavaklgyakdrpapl

VKIQEENLSAMNTDPLYSAYHVSHPPLVERLRNLDGEDKKTID----
At_Ste24p VKIQEENLSAMNTDPLYSAYHVSHPPLVERLRNLDGEDKKTID----
Sc_Ste24p IDIQIKNLGMMNVDPLYSAYHVSHPPLVERLRNLDGEDKKTID----
Hs_Zmpste24 IKIKNDNLGMMNVDPLYSAYHVSHPPLVERLRNLDGEDKKTID----
Ce_Ste24p TKIKVDNLGMMNVDPLYSAYHVSHPPLVERLRNLDGEDKKTID----
Dm_CG9000 IKLNVNLDGMMNVDPLYSAYHVSHPPLVERLRNLDGEDKKTID----
Dm_CG9001 LKLVADNLGMMNVDPLYSAYHVSHPPLVERLRNLDGEDKKTID----
Dm_CG9002 VKIYADHMSFPVYDCCARWHTHTPTDORLAYOQKLDVYAMNAGTY
Dm_CG7573 LKIFSDYELGFPVYDCCARWHTHTPTDORLAYOQKLDVYAMNAGTY
consensus vkiq-eenlsamntd-plys-ay-hvshpp-lerlrnldgedkktid-


```

**Figure S1** Clustal W alignment of sequences for the type I prenyl protease and the *Drosophila* paralogs. All sequences were obtained through the relevant genome project websites. The canonical Zinc ion binding site (HEXXH) that comprises the active site of the enzyme is indicated with asterisks (\*). At: *Arabidopsis thaliana*; Sc: *Saccharomyces cerevisiae*; Ce: *C. elegans*; Hs: *Homo sapiens*; Dm: *Drosophila melanogaster*.

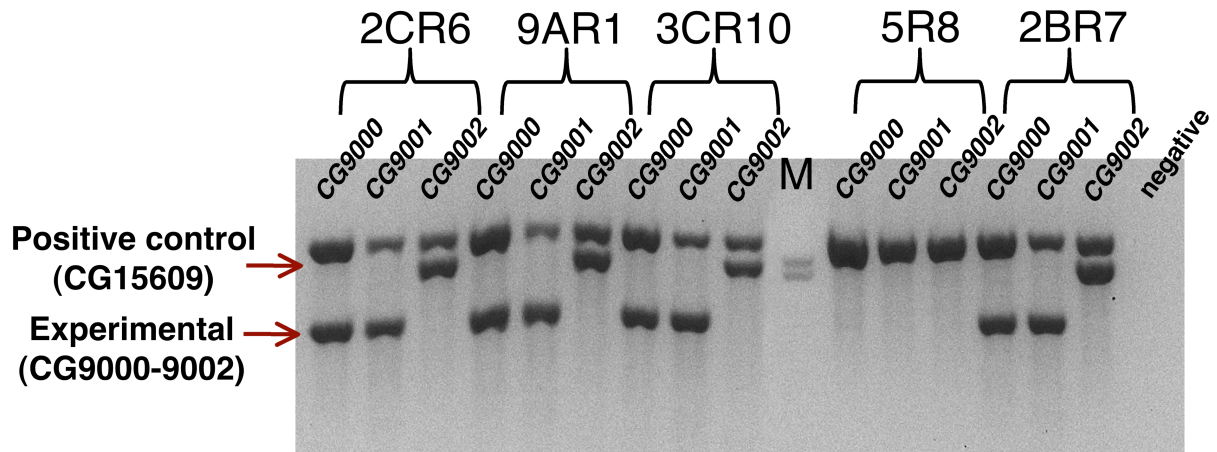

**Figure S2** A representative multiplex PCR result using genomic DNA from potential triple knock-out lines. The positive control is a gene (*CG15609*) in the vicinity of the tandem *STE24* cluster, not removed by the targeted deletion. Experimental bands arise from PCR primers for *CG9000*, *CG9001* or *CG9002*. 2CR6, 9AR1, 3CR10, 5R8 and 2BR7 are all potential triple knock-out lines. All are false positives except for line 5R8, where the three tandem prenyl proteases are shown to be absent. PCR programming and conditions are described in Methods. Primer positions are depicted in Figure 1A, and sequences in Table S1.

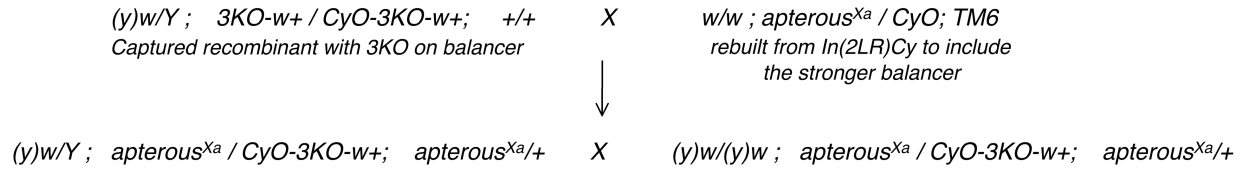

**Figure S3** Strategy used to recover and maintain the recombinant balancer chromosome. On two occasions, a balanced male was recovered that appeared to have a double dose of the wild type red eye color (*w+*) reporter that identified the triple knock-out (3KO) chromosome. In both cases, the male was virtually sterile, but when crossed to a stock bearing the reciprocal translocation *apterous<sup>Xa</sup>*, it was possible to recover the *CyO* balancer bearing the triple knock out and maintain it in a stock. PCR was used to confirm the balancer had lost the three *Drosophila STE24* paralogs. Note that in this reciprocal translocation (the *apterous<sup>Xa</sup>* chromosome), the region containing the three *STE24* paralogs now resides over on the third chromosome rather than the second. The original parental reciprocal translocation chromosome *apterous<sup>Xa</sup>* was obtained from the Bloomington Indiana Stock center, stock #3234, where the balancer for the second is *In(2L)Cy, In(2R)Cy, Cy[1]*. The instability for the *CG9000* region was unanticipated, and thus when discovered, the original Bloomington stock was rebuilt over *CyO; TM6*.

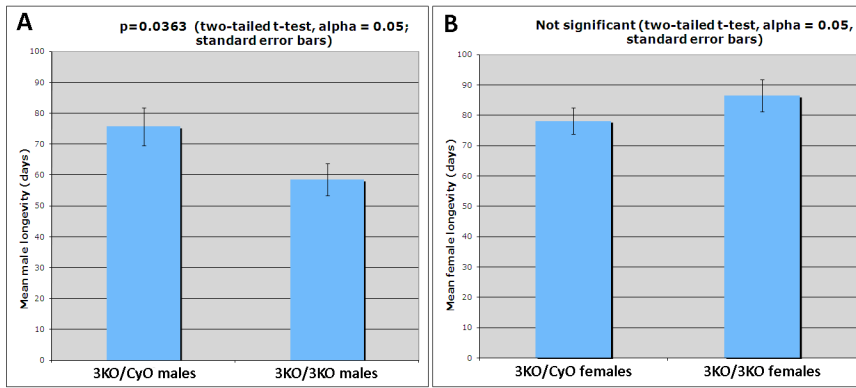

**Figure S4** A triple knock-out (3KO) for the type I prenyl protease in *Drosophila* has a modest but statistically significant effect on life span in males only.

```

mel_9002      MAP-VDTWPKVDPPIVLLVVLQCLIVLVDRIEWEMILTKRQQLVCLNSIMVPEELRGHIPPETVHRARHYELHHTELQIWRVLDLITLDCBLLILGYPFLWWSAKTLCQKISQBIWITLDF
erecta_9002  MAP-VDTWPKVDPPIVLLVVLQCLIVLVDRIEWEMILTKRQQLVCLNSIMVPEELRGHIPPETVHRARHYELHHTELQIWRVLDLITLDCBLLILGYPFLWWSAKTLCQKISQBIWITLDF
yak_9002     MAP-VDTWPKVDPPIVLLVVLQCLIVLVDRIEWEMILTKRQQLVCLNSIMVPEELRGHIPPETVHRARHYELHHTELQIWRVLDLITLDCBLLILGYPFLWWSAKTLCQKISQBIWITLDF
anna_9002   MAPFEHWKEDDEHLLVVLQCLIVLVDRIEWEMILTKRQQLVCLNSIMVPEELRGHIPPETVHRARHYELHHTELQIWRVLDLITLDCBLLILGYPFLWWSAKTLCQKISQBIWITLDF
yak_30461   MTRTKAATPRCETAKLVVSS--IGSGEELIYADATTRSFCAN-----PSWLNPFQNGMMETGPISEKPNPHDSQKASPLRRHFGQR-----
erect_30461 MTRTKAATPRCETAKLVVSS--IGSGEELIYADATTRSFCAN-----PSWLNPFQNGMMETGPISEKPNPHDSQKASPLRRHFGQR-----
mel_30461_PD MTRTKAATPRCETAKLVVSS--IGSGEELIYADATTRSFCAN-----PSWLNPFQNGMMETGPISEKPNPHDSQKASPLRRHFGQR-----
ana_30461   MIRTEVTPRCQPTKLVVSS--ISSGQTKIYADSSRTFCAN-----PSWLTNSGRMVDSPVCEPAPNDYPRKABLFRLRHFGTSSQTRVSEAA-----
consensus   Ma-yI-wfkcdpiikLVV-clivi-rIwet---krq-s-cAN-imvpeelrgihpp-iyhrariyelh-telpikwdii-e-it-ce--rgfy-flw-l---tlq-t--e-witlif

mel_9002      VFYLTIIYICIRFLPVLLIYDKCLELRYGMSGKFPWYLYCIGAMSNLSSQLVDFPDAAAIVPSVKFIGVYFLLWFWLFWAFVFLLVFVFLPCCIPCIGRQVVLPEGTALYMEVKKRVCDV
erecta_9002  VFYLTIIYICIRFLPVLLIYDKCLELRYGMSGKFPWYLYCIGALSVLSSQLVDFPDAAAIVPSVQLIGVYFLLWFWLFWAFVFLLVFVFLPCCIPCIGRQVVLPEGTALYMEVKKRVCDV
yak_9002     VFYLTIIYICIRFLPVLLIYDKCLELRYGMSGTRFPWYCYGCGALAILVSSQLVDFPDAAAIVPSVQLIGVYFLLWFWLFWAFVFLLVFVFLPCCIPCIGRQVVLPEGTALYMEVKKRVCDM
anna_9002   VFYLTIIYICIRFLPVLLIYDKCLELRYGMRFRFPWYLYCIGVLIAMNLSQLVDFPDAAAIVPSVQLIGVYFLLWFWLFWAFVFLLVFVFLPCCIPCIGRQVVLPEGTALYMEVKKRVCDV
yak_30461   -----FLDSKFLN--ESGSAVDFQERKTIHWHT-----WLVKVRVFPBAOCVAIVKWKQDP-----FTEFLSSCCSWHLQNCMAWQLIISNR--MKDAKFCQSR
erect_30461 -----FLDSMQLN--ESWGAVGFQDNRKTIHWHT-----WLVKVRVFPBAOCVAIVKWKQDP-----FTEFLSSCCSWHLQNCMAWQLIISNR--MKDAKFCQSR
mel_30461_PD -----FLDSQGMN-----AEFKNRKTIHWHT-----WLVKVRVFPBAOCVAIVKWKQDP-----FTEFLSSCCSWHLQNCMAWQLIISNR--MKDAKFCQSR
ana_30461   -----KFLRDELLEDNVLSYNNDLVEKVPLEWHP-----ATVEEVDLPPTQRAITVEYKRP-----VTDTRTFENINWHLQNCMAWQLIISNR--NPSAKCYQSR
consensus   vfylytiyicir-lpvll-dkcllelrygmrrkfpw-yc-ig-m-ily-qlvlpplq-Aivfsvkpgpyyffllwflfwaf-tllvfflpy--pcigr-qvvl---aly-e-k-vCdr

mel_9002      VGFPMKRVFPIKTRTMCQNSNAYFYGSCLLKRVIPTDILLNKGKREBNBIHPYEVGRGLNMQVAGVVCHELGHWKHGHFYKATIIMKIHFPIITMGLFGLFFHSPOLYMAVGFASGVMPPII
erecta_9002  VGFPMKRVFPIKTRTMCQNSNAYFYGSCLLKRVIPTDILLNKGKREBNBIHPYEVGRGLNMQVAGVVCHELGHWKHGHFYKATIIMKIHFPIITMGLFGLFFHSPOLYMAVGFASGVMPPII
yak_9002     VGFPMKRVFPIKTRTMCQNSNAYFYGSCLLKRVIPTDILLNKGKREBNBIHPYEVGRGLNMQVAGVVCHELGHWKHGHFYKATIIMKIHFPIITMGLFGLFFHSPOLYMAVGFASGVMPPII
anna_9002   VGFPMKRVFPIKTRTMCQNSNAYFYGSCLLKRVIPTDILLNKGKREBNBIHPYEVGRGLNMQVAGVVCHELGHWKHGHFYKATIIMKIHFPIITMGLFGLFFHSPOLYMAVGFASGVMPPII
yak_30461   IKKTDVNVCLVDFPELEQDNSVSKDCSPFLAALTEKVFVGFATGMLKLNLDLELQEKLRNRYKRLVE-----
erect_30461 IKKTDVNVCLVDFPELEQDNSVSKDCSPFLAALTEKVFVGFATGMLKLNLDLELQEKLRNRYKRLVE-----
mel_30461_PD IKKTDVNVCLVDFSEVEEKTFTKDCSPFLAALTEKVFVGFATGMLKLNLDLELQEKLRNRYKRLVE-----
ana_30461   IRKTDVNTVDFPELFDIDSSDDGALVPLSMKVQSASHMLKLNLDLELQEKLRNRYKRLVE-----
consensus   vg-pmDtrv-iivtr-mqqsnaif-gScllkrivi-tl-lnk-klnei-p-vgr-lt-igv-gvvcchelghwkghfykatiimkihftmgifglffh-p-lymavgf-gv-pii

mel_9002      VGFIIIVLRFAMTPYLLANVLMWNLRRFYYAADFPAHRMGYSIQLRMALVKIYADHMSFPVYDQCYARWHHTHTPTILORLAYQOKLDVKAMNAGTY
erecta_9002  VGFIIIVLRFAMTPYLLANVLMWNLRRFYYAADFPAHRMGYSIQLRMALVKIYADHMSFPVYDQCYARWHHTHTPTILORLAYQOKLDGRAMNAWS
yak_9002     VGFIIIVLRFAMTPYLLANVLMWNLRRFYYAADFPAHRMGYSIQLRMALVKIYADHMSFPVYDQCYARWHHTHTPTILORLAYQOKLDKAMNT--
anna_9002   VGFIIIVLRFAMTPYLLANVLMWNLRRFYYAADFPAHRMGYSIQLRMALVKIYADHMSFPVYDQCYARWHHTHTPTILORLAYQOKLDNKETSKK--
yak_30461   -----
erect_30461 -----
mel_30461_PD -----
ana_30461   -----
consensus   vgfiiivlkfaltpyl-lanvlmwnlrrfeyaadkfah-mgysi-lrmalvkiiyadhmsfpvyd-cyarwhhthtptil-fl-yqqkld-k-----

```

**Figure S5** Clustal W alignment of *CG9002* and *CG30461* from the *Drosophila* subgroup (*D.melanogaster*, *D. erecta*, *D. yakuba*, *D. annasae*), indicating sequence homology. Significant similarity reveals itself when *CG30461* is aligned solely with *CG9002* sequences from the most recently evolved members of the *Drosophila* genus. The HEXXH zinc ion binding site is indicated with asterisks (\*).

Thompson, J. D., D. G. Higgins, and T. J. Gibson, 1994 Clustal W: improving the sensitivity of progressive multiple sequence alignments through sequence weighting, position specific gap penalties and weight matrix choice. *Nucl. Acids Res.* **22**: 4673-4680.

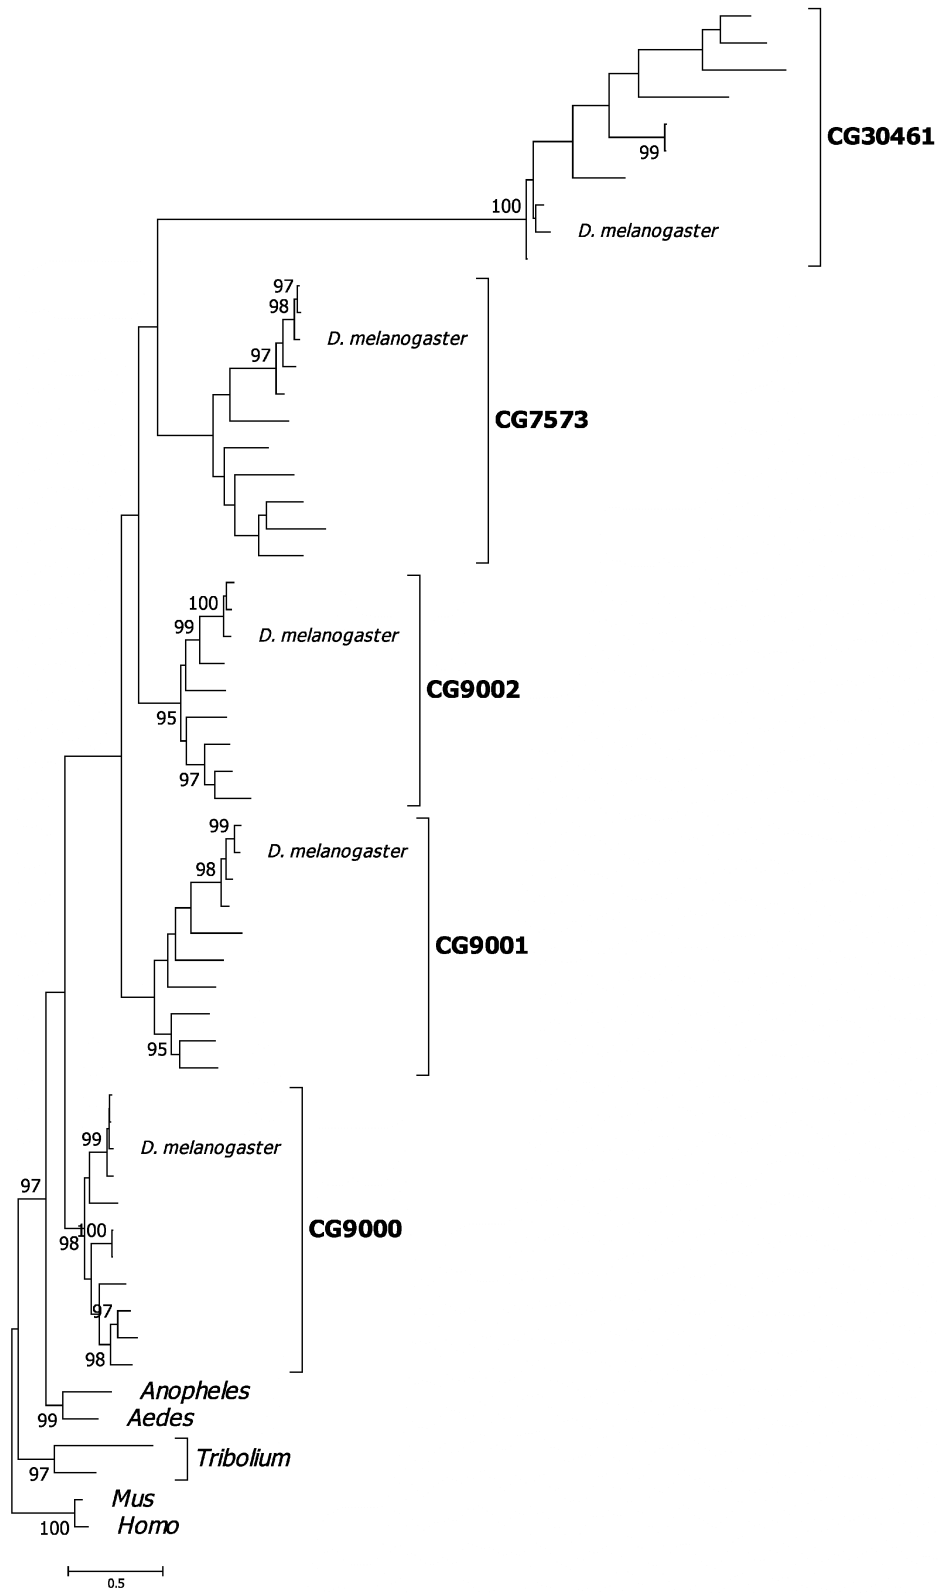

**Figure S6** Phylogenetic analysis of the *STE24* paralogs in *Drosophila*, including the potential non-processed pseudogene *CG30461*. Maximum Likelihood phylogeny for *CG9000* and paralogs including *CG30461*. CG numbers denote the clades of *Drosophila* species for the respective locus. The figures above the nodes are the results from bootstrap analysis with 500 replicates (only bootstrap values  $\geq 95$  are shown). The scale is given as substitutions per site.

Tamura, K., D. Peterson, N. Peterson, G. Stecher, M. Nei, et al., 2011 MEGA5: Molecular Evolutionary Genetics Analysis using Maximum Likelihood, Evolutionary Distance, and Maximum Parsimony Methods. *Mol. Biol and Evol.* **10.1093/molbev/msr121**.

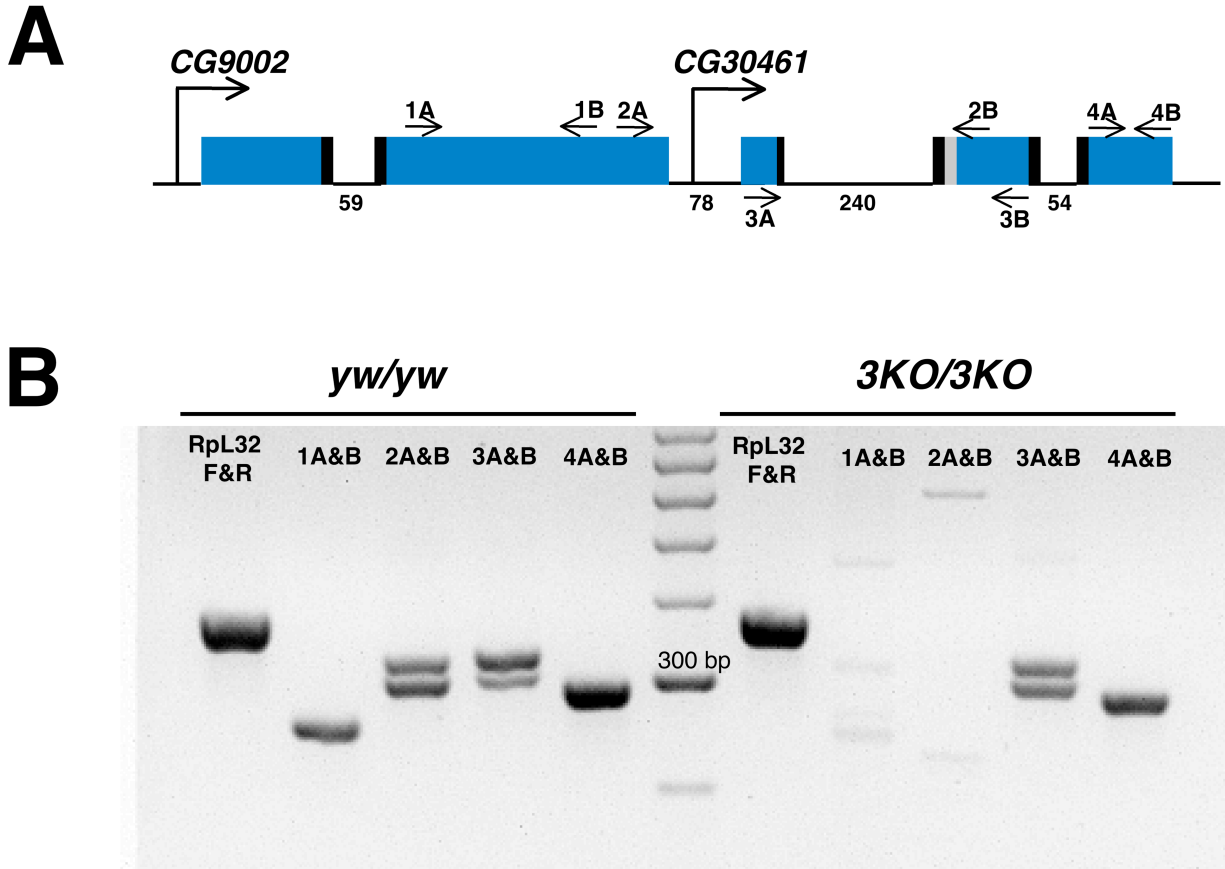

**Figure S7** *CG9002* and *CG30461* can be expressed independently and also together as a dicistronic unit. (A): Diagram (not to scale) depicting the genomic structure of the region containing *CG9002* and *CG30461*. Blue boxes indicate exons, right-angle arrows indicate putative promoter regions, black bars represent splicing consensus sequences, with a grey bar indicating an alternative site in the second exon of *CG30461*. The intergenic space and all intron sizes are indicated in base pairs. Horizontal arrows indicate position of primers used to distinguish fusion from unique transcripts. (B): representative reverse transcriptase PCR result (one replicate from multiple RNA extractions) indicating existence of both fusion and unique transcripts arising from the *CG30461* locus, and the presence of multiple transcripts due to alternative splice sites in the first intron of *CG30461*. *yw* refers to a wild type stock for the prenyl protease genes; *3KO* refers to the triple knock-out genotype. *RpL32* (AKA *rp49*) was used as an external control; F & R refer to forward and reverse primers (Table S1). This experiment also shows that *CG30461* can be expressed independently of *CG9002*.



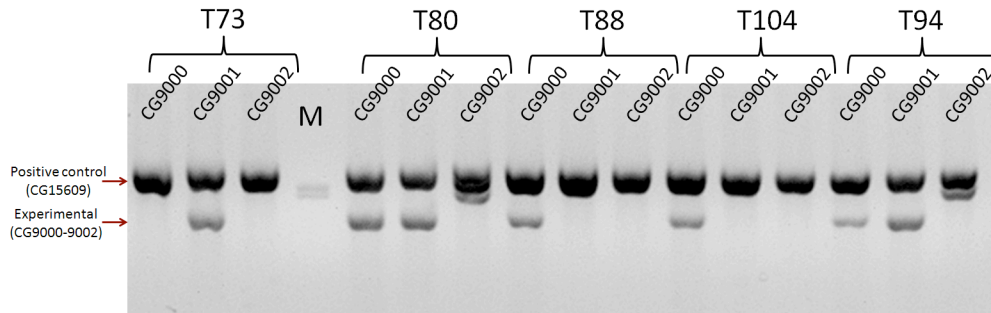

**Figure S8** PCR analysis of potential rescues. Multiplex PCR was used to detect which rescue experiments represent genomic rescue from the balancer (three genes restored) and which represented rescue from the transgene (only one gene restored). For every cross, a single test male (T) was crossed to 3-4 triple knock-out females, and DNA both the parents and resulting progeny was extracted and subjected to multiplex PCR as described in the materials and methods. So in the example shown above, T80 and T94 (T = test male) are PCR results generated from DNA obtained from all parents and progeny (up to 50 flies) in which rescue has occurred due to a recombination event from the balancer in the mother's germ line (the test male was recombinant; the genes are back). T73 represents PCR results generated from DNA obtained from all parents and progeny of a potential transgenic *CG9001* rescue, and T88 and 104 are potential *CG9000* rescues.

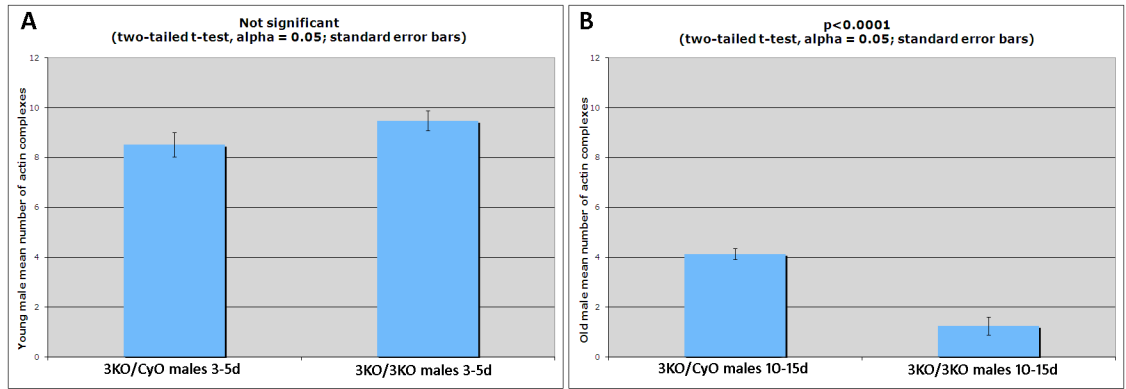

**Figure S9** The number of individualization actin complexes decreases dramatically in aged triple knock-out (3KO) males relative to their age-matched heterozygous siblings.

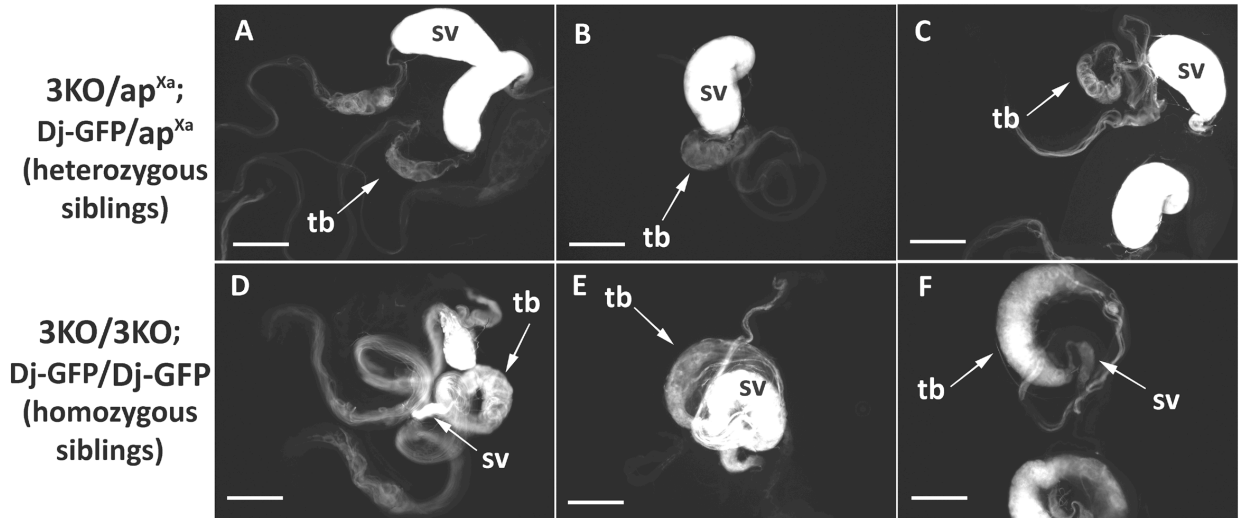

**Figure S10** Don-Juan GFP only images of testes dissected from heterozygous (A,B,C) and homozygous (D,E,F) triple knock-out flies. SPOT camera settings were identical for all figures (brightness 1.1, gain 2, gamma 1). Fluorescence throughout the length of the testes corresponding to elongating individualizing spermatids appears relatively unchanged between heterozygotes and homozygotes, but there is a distinct difference in the brightness of the seminal vesicles, suggesting that one manifestation of type I prenyl protease loss is a reduced ability to move mature spermatids into the seminal vesicles. tb= testis base; sv = seminal vesicles. Scale bar is 200  $\mu$ M.

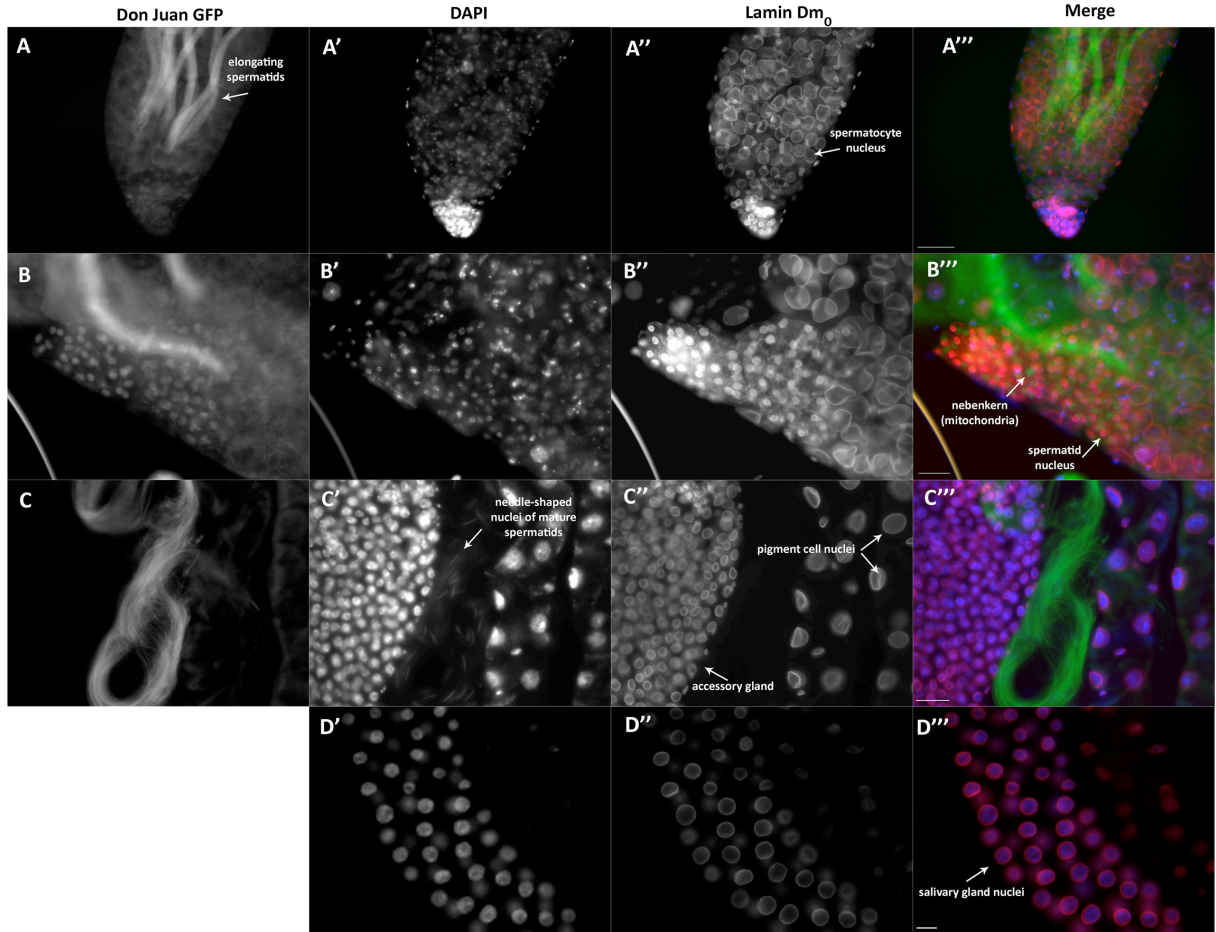

**Figure S11** Montage of Lamin Dm<sub>0</sub> and Don-Juan (where applicable) in testes (A-C through A'''-C''' inclusive; scale bar for A panels is 40  $\mu$ M; scale bar for B and C panels is 20  $\mu$ M) and salivary glands (D', D'', D'''; scale bar 20  $\mu$ M). Normal nuclear rim staining for Lamin Dm<sub>0</sub> is evident in primary spermatocytes and pigment cells (present in all images) of both genotypes (wild type and triple knock-out). Lamin Dm<sub>0</sub> is more diffuse in onion-stage spermatids (B: scale bar is 20  $\mu$ M), coincident with the coalescence of mitochondria into Nebenkern (round structures that appear like an onion in cross-section, hence the name onion stage). In part C (scale bar is 20  $\mu$ M), Lamin Dm<sub>0</sub> can only be seen localizing to the nuclei of the pigment cells that mark the sheath covering the testes. There is no trace of Lamin Dm<sub>0</sub> in the nuclei of mature spermatids. Normal nuclear rim staining of Lamin Dm<sub>0</sub> is also evident in salivary glands of both genotypes (D panels). All males are 3-4 weeks old and mated, and the montage represents the best pictures pooled from triple knock-out homozygotes and heterozygotes, as they were indistinguishable for Lamin Dm<sub>0</sub> localization.

**Table S1 Primers used in this study**

| Primer name                      | Primer sequence                               |
|----------------------------------|-----------------------------------------------|
| 9000NotI a                       | ATA TAT GC GGCC GC TGT CCG TCC GTT GCG TGA G  |
| 9000SaclI c                      | ATA TAT CCGC GG CAT GTG TGA CTT CAG TTC GGC   |
| 9000Ascl b                       | ATA TAT GG CGCG CC GGC CTA TCA GCA GAA ACT GG |
| 9000AvrII b                      | ATA TAT CCT AGG CGA GTG TCA ACG GCA GAG AAC   |
| 9000HRGSP20 (Forward for CG9000) | CGT TAT CTC GCT GGT TCT ACT C                 |
| 9000HRGSP21 (Reverse for CG9000) | CAC GTA GAA TGG TGG ATA CTT G                 |
| 9000HRGSP22 (Forward for CG9001) | TTA TCA GCC CCT ATC TAC CAC A                 |
| 9000HRGSP23 (Reverse for CG9001) | TGA AGG TAC AAG CCC AGG GG                    |
| 9000HRGSP24 (Forward for CG9002) | GGC AGG TAA GTA GTG GAT TGG T                 |
| 9000HRGSP25 (Reverse for CG9002) | GTA CCC AAT GAA CTT TAC GCT G                 |
| CG6805 GSP1                      | CCA TGT GGG ACT GAT AAG ACA G                 |
| CG6805 GSP2                      | TCG ACT TTC GCT CTA CGG AA                    |
| CG15609 GSP1                     | GTG ATC CGA AGG TCC TAC AG                    |
| CG15609 GSP2                     | GTT CAC AAA GCA CGA ATG GG                    |
| Rp49 (AKARpL32) F                | GAC CAT CCG CCC AGC ATA                       |
| Rp49 (AKARpL32) R                | CGT TGG GGT TGG TGA GGC                       |
| 9002RTF (1A in Figure S7)        | CAATCATAGTGCTGGTGGTG                          |
| 9002RTR (1B in Figure S7)        | CAG AGG AAT GGA TAG AAG CC                    |
| 30461RTF (3A in Figure S7)       | CCG CTG TGA AAC TAT CTC C                     |
| 30461RTR (3B in Figure S7)       | ATT CCT TGA TGA CCG CAC AC                    |
| 30461RT01F (4A in Figure S7)     | AGC TCA GTG TGC GGT CAT C                     |
| 30461RT01R (4B in Figure S7)     | AGA TCA TTC AGT TTC TTC AGC A                 |
| 9002FUS RTF (2A in Figure S7)    | CTA CGA CCA ATG CTA TGC TC                    |
| 9002FUS RTR (2B in Figure S7)    | CTT CAG CCA CGA GGG ATT C                     |

**Table S2 Penetrance and expressivity test**

|                | ♂1   | ♂2   | ♂3   | ♂4   | ♂5   | ♂6   | ♂7   | ♂8   | ♂9   | ♂10  | ♂11  | ♂12  | ♂13  | ♂14  | ♂15  |
|----------------|------|------|------|------|------|------|------|------|------|------|------|------|------|------|------|
| <i>3KO/3KO</i> | 4    | 2    | 0    | 0    | 3    | 1    | 5    | 16   | 0    | 1    | 3    | 10   | 0    | 0    | 2    |
| <i>yw/yw</i>   | 100+ | 100+ | 100+ | 100+ | 100+ | 100+ | 100+ | 100+ | 100+ | 100+ | 100+ | 100+ | 100+ | 100+ | 100+ |

The triple knock-out (3KO) genotype causes a fully penetrant but variably expressive fertility defect in males. Fifteen single triple knock-out males were crossed to four virgin homozygous triple knock-out sibs, and the crosses turned every three to five days and scored for adult progeny (the value in each cell of the table refers to the number of progeny). Controls consisted of age-matched wild type (*yw*) individual males crossed to four virgin wild type (*yw*) females and turned every three to five days, and scoring stopped after progeny numbers exceeded 100.

**Table S3 Annotation of Rhagoletis genomic sequence contigs resulting from tblastx analysis**

| First four blastx hits ordered from most to least similar | Max identity % | E-value   |
|-----------------------------------------------------------|----------------|-----------|
| <b>Rhagoletis contig 1 CG9000 search</b>                  |                |           |
| <i>CG9000</i>                                             | 79.53          | 0         |
| <i>CG9001</i>                                             | 40.29          | 2.00E-88  |
| <i>CG9002</i>                                             | 37.43          | 6.00E-78  |
| <i>CG7573</i>                                             | 26.2           | 6.00E-33  |
| <b>Rhagoletis contig 2 CG9000 search</b>                  |                |           |
| <i>CG9000</i>                                             | 56.72          | 3.00E-23  |
| <i>CG9001</i>                                             | 31.82          | 3.00E-07  |
| <i>CG9002</i>                                             | 31.58          | 8.00E-07  |
| <i>small wing</i>                                         | 29.17          | 5.00E-04  |
| <b>Rhagoletis contig CG9001 search</b>                    |                |           |
| <i>CG9000</i>                                             | 83.42          | 1.00E-124 |
| <i>CG9001</i>                                             | 52.38          | 6.00E-73  |
| <i>CG9002</i>                                             | 46.7           | 3.00E-61  |
| <i>CG7573</i>                                             | 31.22          | 9.00E-29  |
| <b>Rhagoletis contig 1 CG9002 search</b>                  |                |           |
| <i>CG9000</i>                                             | 78.5           | 3.00E-60  |
| <i>CG9001</i>                                             | 51.89          | 2.00E-40  |
| <i>CG9002</i>                                             | 45.87          | 2.00E-32  |
| <i>CG7573</i>                                             | 34.31          | 2.00E-15  |
| <b>Rhagoletis contig 2 CG9002 search</b>                  |                |           |
| <i>CG9000</i>                                             | 88.42          | 5.00E-59  |
| <i>CG9001</i>                                             | 52.33          | 2.00E-28  |
| <i>CG9002</i>                                             | 48.89          | 3.00E-25  |
| <i>CG7573</i>                                             | 29.63          | 2.00E-11  |
| <b>Rhagoletis contig 2 CG4852 search</b>                  |                |           |
| <i>CG4852</i>                                             | 79.27          | 7.00E-46  |
| <i>alpha-spectrin</i>                                     | 42.11          | 0.001     |
| <i>rigor mortis</i>                                       | 34.78          | 0.003     |

The Rhagoletis contigs that served as queries are in bold with the best blast hits for each query listed below. Each Rhagoletis contig was assembled from genomic reads that had been identified by a blast search as being similar to the listed *D. melanogaster* locus. Some searches of the Rhagoletis genome with a single *Drosophila* locus resulted in 2 separate non-overlapping contigs. Note that no contig in the Rhagoletis genome could be constructed from a search with *Drosophila* CG7573 due to the absence of any homologous sequences. See Materials and Methods for further details.

**Table S4 Results of relative rate tests between *D. melanogaster* paralogs and *Anopheles* and *Rhagoletis* STE24.**

| Taxon 1                       | Taxon 2                      | p-value    |
|-------------------------------|------------------------------|------------|
| <i>Anopheles</i> STE24 (108)  | <i>D. mel.</i> CG9000 (112)  | 0.787      |
| <i>Rhagoletis</i> STE24 (133) | <i>D. mel.</i> CG9000 (141)  | 0.629      |
| <i>D. mel.</i> CG9000 (94)    | <i>D. mel.</i> CG9001 (209)  | < 0.00001* |
| <i>D. mel.</i> CG9000 (96)    | <i>D. mel.</i> CG9002 (194)  | < 0.00001* |
| <i>D. mel.</i> CG9000 (100)   | <i>D. mel.</i> CG7573 (234)  | < 0.00001* |
| <i>D. mel.</i> CG9000 (64)    | <i>D. mel.</i> CG30461 (227) | < 0.00001* |
| <i>D. mel.</i> CG9001 (137)   | <i>D. mel.</i> CG9002 (120)  | 0.289      |
| <i>D. mel.</i> CG9001 (139)   | <i>D. mel.</i> CG7573 (157)  | 0.296      |
| <i>D. mel.</i> CG9001 (85)    | <i>D. mel.</i> CG30461 (166) | < 0.00001* |
| <i>D. mel.</i> CG9002 (116)   | <i>D. mel.</i> CG7573 (155)  | 0.018      |
| <i>D. mel.</i> CG9002 (87)    | <i>D. mel.</i> CG30461 (192) | < 0.00001* |
| <i>D. mel.</i> CG7573 (91)    | <i>D. mel.</i> CG30461 (166) | < 0.00001* |

\* = significant rate differences after Benjamini-Hochberg correction.

*Homo sapiens* served as the outgroup in all tests. The number of unique nucleotide differences for each taxon is listed in brackets.
