# Supplementary material for: Type-I Prenyl Protease Function Is Required in the Male Germline of Drosophila melanogaster
Source: PubMed Central journal article supplement (PMC3362292; doi:10.1534/g3.112.002188), 2012-06-01
Supplement: supp_2.6.629_FigureS4.pdf [file supp_2.6.629_FigureS4.pdf]

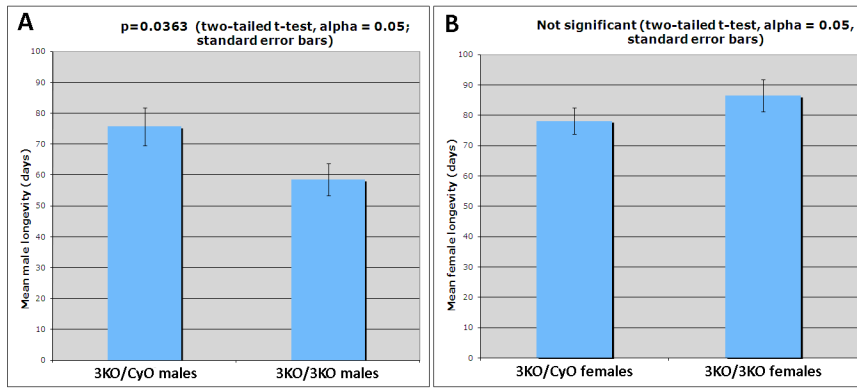

**Figure S4** A triple knock-out (3KO) for the type I prenyl protease in *Drosophila* has a modest but statistically significant effect on life span in males only.
