# Supplementary material for: Type-I Prenyl Protease Function Is Required in the Male Germline of Drosophila melanogaster
Source: PubMed Central journal article supplement (PMC3362292; doi:10.1534/g3.112.002188), 2012-06-01
Supplement: supp_2.6.629_FigureS9.pdf [file supp_2.6.629_FigureS9.pdf]

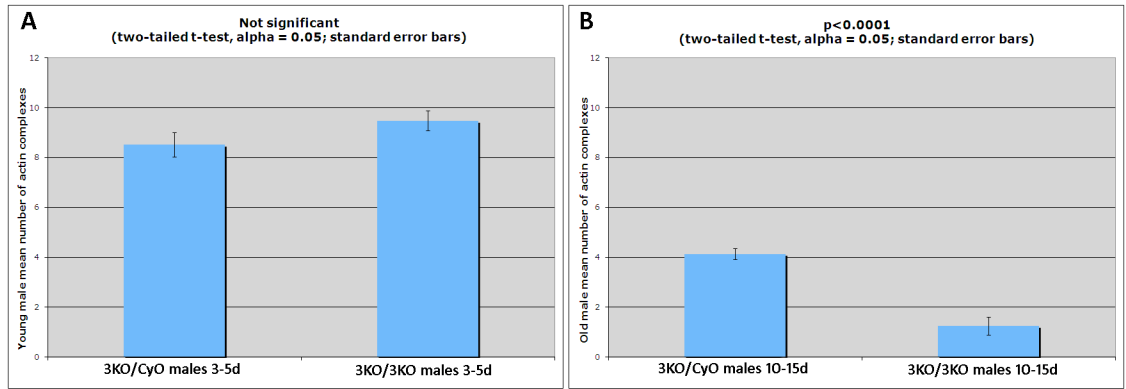

**Figure S9** The number of individualization actin complexes decreases dramatically in aged triple knock-out (3KO) males relative to their age-matched heterozygous siblings.
