# Supplementary material for: Type-I Prenyl Protease Function Is Required in the Male Germline of Drosophila melanogaster
Source: PubMed Central journal article supplement (PMC3362292; doi:10.1534/g3.112.002188), 2012-06-01
Supplement: supp_2.6.629_FigureS11.pdf [file supp_2.6.629_FigureS11.pdf]

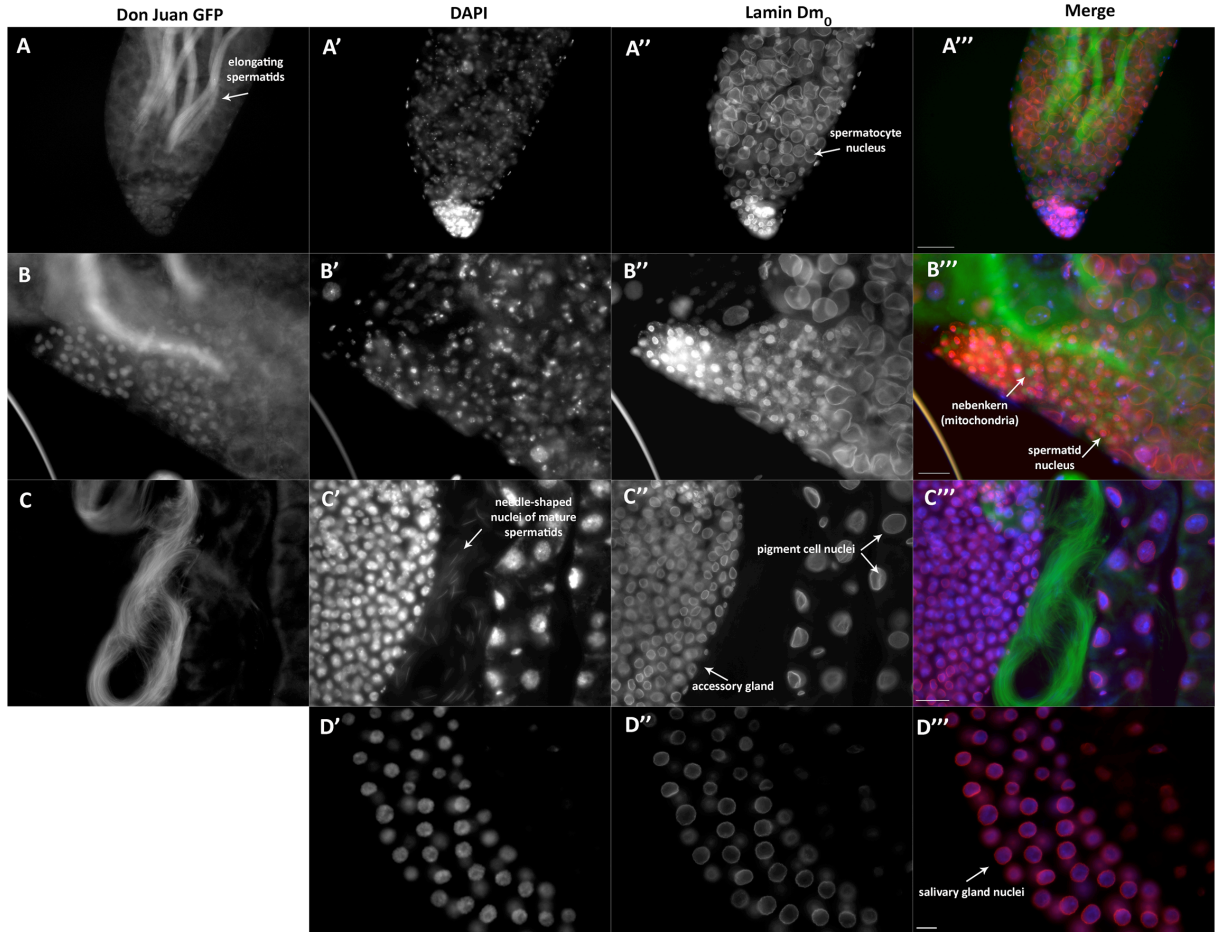

**Figure S11** Montage of Lamin Dm<sub>0</sub> and Don-Juan (where applicable) in testes (A-C through A'''-C''' inclusive; scale bar for A panels is 40  $\mu$ M; scale bar for B and C panels is 20  $\mu$ M) and salivary glands (D', D'', D'''; scale bar 20  $\mu$ M). Normal nuclear rim staining for Lamin Dm<sub>0</sub> is evident in primary spermatocytes and pigment cells (present in all images) of both genotypes (wild type and triple knock-out). Lamin Dm<sub>0</sub> is more diffuse in onion-stage spermatids (B: scale bar is 20  $\mu$ M), coincident with the coalescence of mitochondria into Nebenkern (round structures that appear like an onion in cross-section, hence the name onion stage). In part C (scale bar is 20  $\mu$ M), Lamin Dm<sub>0</sub> can only be seen localizing to the nuclei of the pigment cells that mark the sheath covering the testes. There is no trace of Lamin Dm<sub>0</sub> in the nuclei of mature spermatids. Normal nuclear rim staining of Lamin Dm<sub>0</sub> is also evident in salivary glands of both genotypes (D panels). All males are 3-4 weeks old and mated, and the montage represents the best pictures pooled from triple knock-out homozygotes and heterozygotes, as they were indistinguishable for Lamin Dm<sub>0</sub> localization.
