# Supplementary material for: Type-I Prenyl Protease Function Is Required in the Male Germline of Drosophila melanogaster
Source: PubMed Central journal article supplement (PMC3362292; doi:10.1534/g3.112.002188), 2012-06-01
Supplement: supp_2.6.629_TableS1.pdf [file supp_2.6.629_TableS1.pdf]

**Table S1 Primers used in this study**

| Primer name                      | Primer sequence                               |
|----------------------------------|-----------------------------------------------|
| 9000NotI a                       | ATA TAT GC GGCC GC TGT CCG TCC GTT GCG TGA G  |
| 9000SaclI c                      | ATA TAT CCGC GG CAT GTG TGA CTT CAG TTC GGC   |
| 9000Ascl b                       | ATA TAT GG CGCG CC GGC CTA TCA GCA GAA ACT GG |
| 9000AvrII b                      | ATA TAT CCT AGG CGA GTG TCA ACG GCA GAG AAC   |
| 9000HRGSP20 (Forward for CG9000) | CGT TAT CTC GCT GGT TCT ACT C                 |
| 9000HRGSP21 (Reverse for CG9000) | CAC GTA GAA TGG TGG ATA CTT G                 |
| 9000HRGSP22 (Forward for CG9001) | TTA TCA GCC CCT ATC TAC CAC A                 |
| 9000HRGSP23 (Reverse for CG9001) | TGA AGG TAC AAG CCC AGG GG                    |
| 9000HRGSP24 (Forward for CG9002) | GGC AGG TAA GTA GTG GAT TGG T                 |
| 9000HRGSP25 (Reverse for CG9002) | GTA CCC AAT GAA CTT TAC GCT G                 |
| CG6805 GSP1                      | CCA TGT GGG ACT GAT AAG ACA G                 |
| CG6805 GSP2                      | TCG ACT TTC GCT CTA CGG AA                    |
| CG15609 GSP1                     | GTG ATC CGA AGG TCC TAC AG                    |
| CG15609 GSP2                     | GTT CAC AAA GCA CGA ATG GG                    |
| Rp49 (AKARpL32) F                | GAC CAT CCG CCC AGC ATA                       |
| Rp49 (AKARpL32) R                | CGT TGG GGT TGG TGA GGC                       |
| 9002RTF (1A in Figure S7)        | CAATCATAGTGCTGGTGGTG                          |
| 9002RTR (1B in Figure S7)        | CAG AGG AAT GGA TAG AAG CC                    |
| 30461RTF (3A in Figure S7)       | CCG CTG TGA AAC TAT CTC C                     |
| 30461RTR (3B in Figure S7)       | ATT CCT TGA TGA CCG CAC AC                    |
| 30461RT01F (4A in Figure S7)     | AGC TCA GTG TGC GGT CAT C                     |
| 30461RT01R (4B in Figure S7)     | AGA TCA TTC AGT TTC TTC AGC A                 |
| 9002FUS RTF (2A in Figure S7)    | CTA CGA CCA ATG CTA TGC TC                    |
| 9002FUS RTR (2B in Figure S7)    | CTT CAG CCA CGA GGG ATT C                     |
