# Supplementary material for: Type-I Prenyl Protease Function Is Required in the Male Germline of Drosophila melanogaster
Source: PubMed Central journal article supplement (PMC3362292; doi:10.1534/g3.112.002188), 2012-06-01
Supplement: supp_2.6.629_TableS4.pdf [file supp_2.6.629_TableS4.pdf]

**Table S4 Results of relative rate tests between *D. melanogaster* paralogs and *Anopheles* and *Rhagoletis* STE24.**

| Taxon 1                       | Taxon 2                      | p-value    |
|-------------------------------|------------------------------|------------|
| <i>Anopheles</i> STE24 (108)  | <i>D. mel.</i> CG9000 (112)  | 0.787      |
| <i>Rhagoletis</i> STE24 (133) | <i>D. mel.</i> CG9000 (141)  | 0.629      |
| <i>D. mel.</i> CG9000 (94)    | <i>D. mel.</i> CG9001 (209)  | < 0.00001* |
| <i>D. mel.</i> CG9000 (96)    | <i>D. mel.</i> CG9002 (194)  | < 0.00001* |
| <i>D. mel.</i> CG9000 (100)   | <i>D. mel.</i> CG7573 (234)  | < 0.00001* |
| <i>D. mel.</i> CG9000 (64)    | <i>D. mel.</i> CG30461 (227) | < 0.00001* |
| <i>D. mel.</i> CG9001 (137)   | <i>D. mel.</i> CG9002 (120)  | 0.289      |
| <i>D. mel.</i> CG9001 (139)   | <i>D. mel.</i> CG7573 (157)  | 0.296      |
| <i>D. mel.</i> CG9001 (85)    | <i>D. mel.</i> CG30461 (166) | < 0.00001* |
| <i>D. mel.</i> CG9002 (116)   | <i>D. mel.</i> CG7573 (155)  | 0.018      |
| <i>D. mel.</i> CG9002 (87)    | <i>D. mel.</i> CG30461 (192) | < 0.00001* |
| <i>D. mel.</i> CG7573 (91)    | <i>D. mel.</i> CG30461 (166) | < 0.00001* |

\* = significant rate differences after Benjamini-Hochberg correction.

*Homo sapiens* served as the outgroup in all tests. The number of unique nucleotide differences for each taxon is listed in brackets.
